# Supplementary material for: RRS1 gene expression involved in the progression of papillary thyroid carcinoma
Source: Springer Nature journal article supplement (doi:10.1186/s12935-018-0519-x), 2018-02-13

# S1

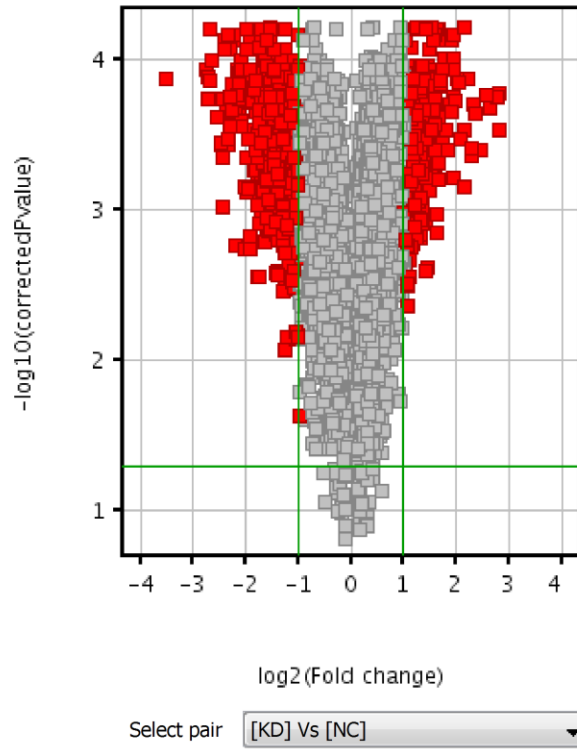

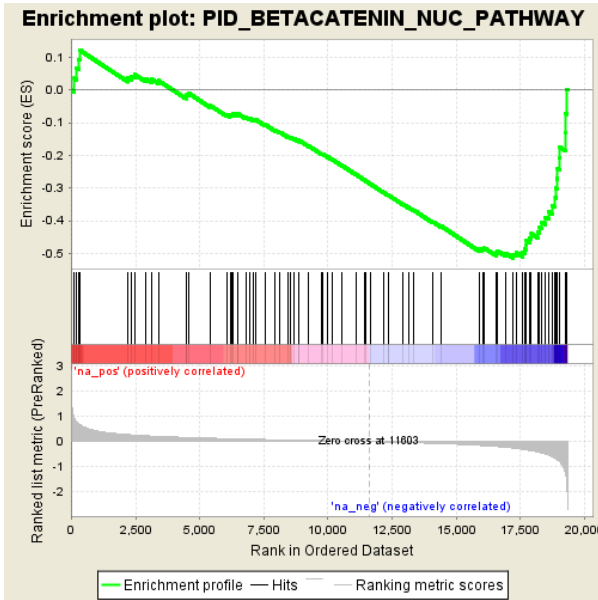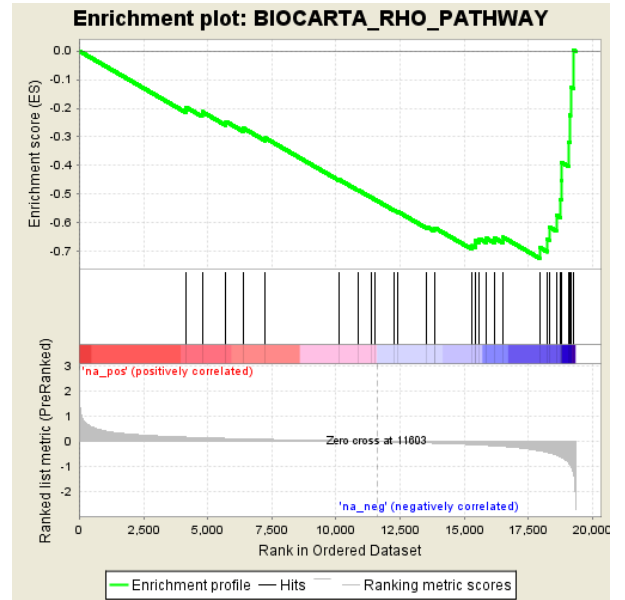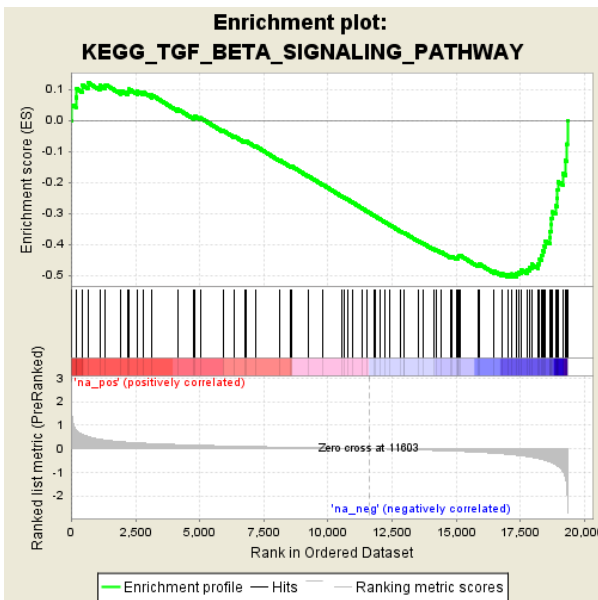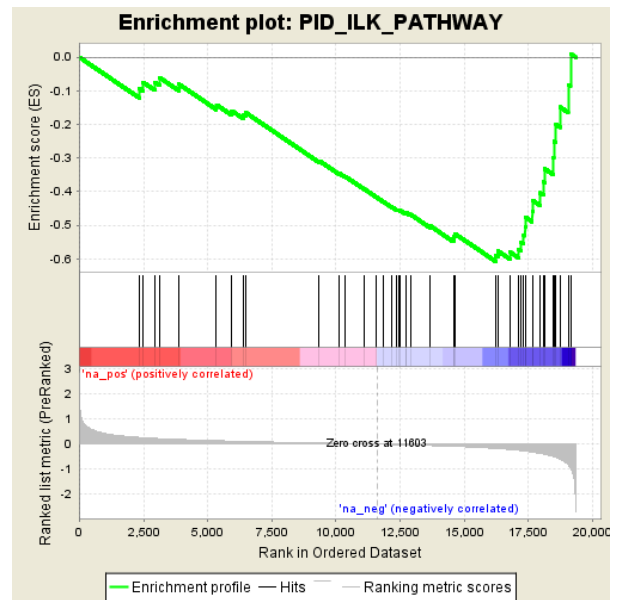

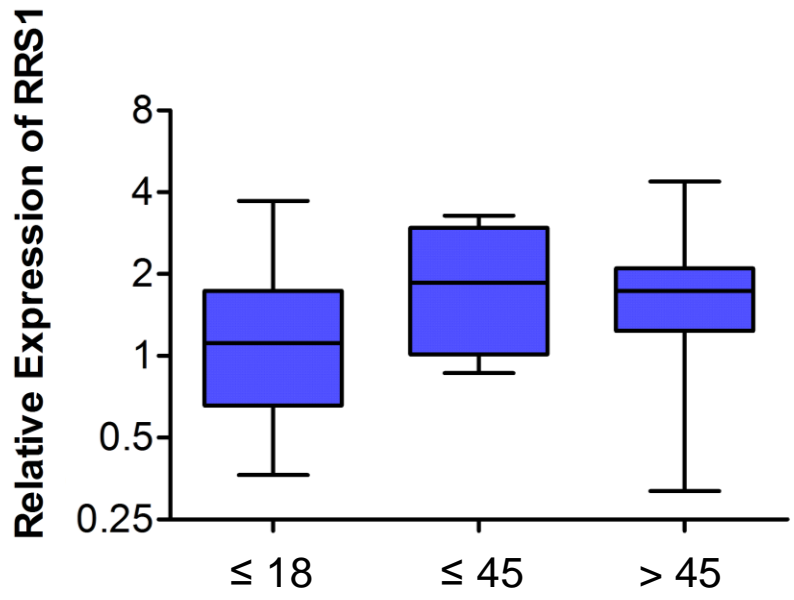

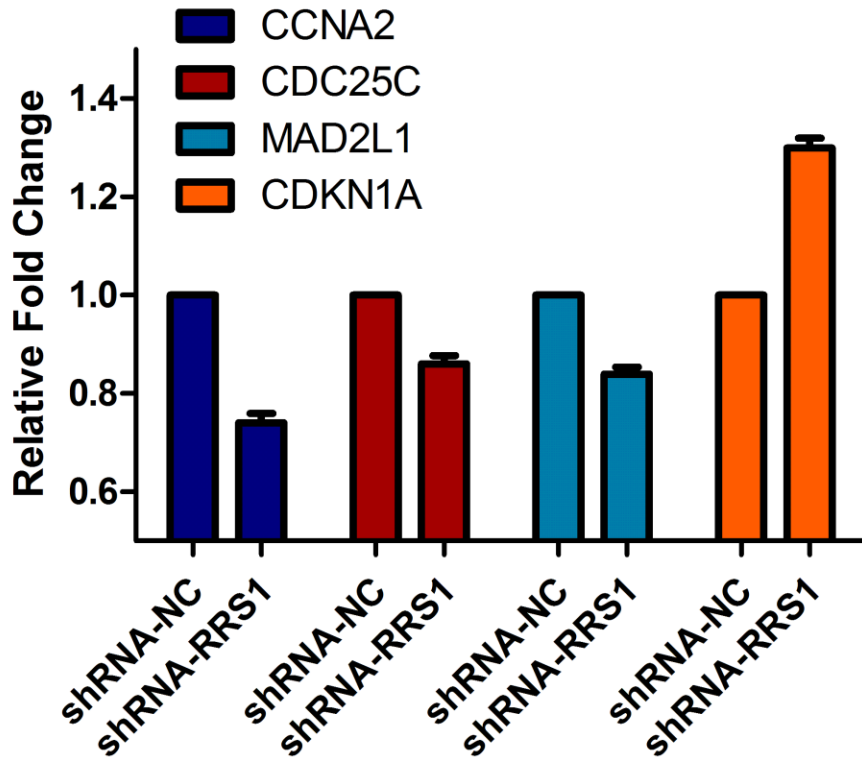

Supplement: MOESM1 [file 15462714]
